# Supplementary material for: Molecular Targets of Triple-Negative Breast Cancer: Where Do We Stand?
Source: MDPI journal article supplement (doi:10.3390/cancers14030482), 2022-01-18
Supplement: s1 [file s1]

**Table S1: Current Phase III Clinical Trials Involving Triple Negative Breast Cancer**

| Category                            | Identifier  | Status                 | Main Intervention       |
|-------------------------------------|-------------|------------------------|-------------------------|
| <b>Immune Checkpoint Inhibitors</b> | NCT04301739 | Not yet recruiting     | Serplulimab             |
|                                     | NCT04177108 | Active; not recruiting | Atezolizumab, ipasertib |
|                                     | NCT04613674 | Recruiting             | Camrelizumab            |
|                                     | NCT04148911 | Recruiting             | Atezolizumab            |
|                                     | NCT04085276 | Recruiting             | Toripalimab             |
|                                     | NCT03498716 | Recruiting             | Atezolizumab            |
|                                     | NCT03281954 | Active; not recruiting | Atezolizumab            |
|                                     | NCT03197935 | Active; not recruiting | Atezolizumab            |
|                                     | NCT03125902 | Active; not recruiting | Atezolizumab            |
|                                     | NCT02425891 | Completed              | Atezolizumab            |
|                                     | NCT02555657 | Completed              | Pembrolizumab           |
|                                     | NCT02819518 | Active; not recruiting | Pembrolizumab           |
|                                     | NCT04335006 | Recruiting             | Camrelizumab, apatinib  |
|                                     | NCT03371017 | Recruiting             | Atezolizumab            |
|                                     | NCT03036488 | Active; not recruiting | Pembrolizumab           |
|                                     | NCT02926196 | Active; not recruiting | Avelumab                |
|                                     | NCT03777579 | Suspended              | Toripalimab             |
|                                     | NCT04907344 | Not yet recruiting     | Camrelizumab            |
|                                     | NCT04191135 | Active; not recruiting | Pembrolizumab, olaparib |
|                                     | NCT04799249 | Recruiting             | Trilaciclib             |
|                                     | NCT02620280 | Active; not recruiting | Atezolizumab            |

|                                     |             |                        |                                                               |
|-------------------------------------|-------------|------------------------|---------------------------------------------------------------|
| <b>Antibody-Drug Conjugates</b>     | NCT02574455 | Completed              | Sacitizumab govitecan                                         |
|                                     | NCT04595565 | Recruiting             | Sacitizumab govitecan                                         |
| <b>RTK Pathway Inhibitors</b>       | NCT04405505 | Not yet recruiting     | Anlotinib                                                     |
|                                     | NCT04177108 | Active; not recruiting | Ipasertib, atezolizumab                                       |
|                                     | NCT04335006 | Recruiting             | Apatinib, camrelizumab                                        |
|                                     | NCT03337724 | Active; not recruiting | Ipatasertib                                                   |
|                                     | NCT03997123 | Recruiting             | Capivasertib                                                  |
|                                     | NCT04251533 | Recruiting             | Alpelisib                                                     |
|                                     | NCT04405505 | Not yet recruiting     | Anlotinib                                                     |
| <b>Androgen Receptor Inhibitors</b> | NCT03055312 | Terminated             | biclutamide                                                   |
|                                     | NCT02929576 | Withdrawn              | enzalutamide                                                  |
| <b>DNA Damage Repair Inhibitors</b> | NCT02032277 | Completed              | Veliparib                                                     |
|                                     | NCT04915755 | Recruiting             | Niraparib                                                     |
|                                     | NCT03150576 | Recruiting             | Olaparib                                                      |
|                                     | NCT00938652 | Completed              | Iniparib                                                      |
| <b>Antibiotics</b>                  | NCT04722978 | Recruiting             | Moxifloxacin                                                  |
| <b>Bisphosphonates</b>              | NCT02595138 | Active; not recruiting | Zoledronic acid                                               |
| <b>Herbal</b>                       | NCT04403529 | Recruiting             | Traditional chinese medicine formation (12 herbal components) |
| <b>Vaccine</b>                      | NCT03562637 | Recruiting             | Adagaloxad simolenin                                          |

|                            |             |                        |              |
|----------------------------|-------------|------------------------|--------------|
| <b>L-Asparaginase</b>      | NCT03674242 | Recruiting             | Eryaspase    |
| <b>VEGF Inhibition</b>     | NCT00528567 | Completed              | Bevacizumab  |
| <b>Liposomal Targeting</b> | NCT03002103 | Recruiting             | EndoTAG-1    |
| <b>Chemotherapy</b>        | NCT01216111 | Recruiting             | Chemotherapy |
|                            | NCT01216111 | Completed              | Chemotherapy |
|                            | NCT03168880 | Active; not recruiting | Chemotherapy |
|                            | NCT04296175 | Recruiting             | Chemotherapy |
|                            | NCT03876886 | Recruiting             | Chemotherapy |
|                            | NCT02546934 | Active; not recruiting | Chemotherapy |
|                            | NCT01287624 | Completed              | Chemotherapy |
|                            | NCT04137653 | Recruiting             | Chemotherapy |
|                            | NCT01642771 | Unknown                | Chemotherapy |
|                            | NCT04031703 | Completed              | Chemotherapy |
|                            | NCT02441933 | Recruiting             | Chemotherapy |
|                            | NCT02455141 | Recruiting             | Chemotherapy |
|                            | NCT02641847 | Unknown                | Chemotherapy |
|                            | NCT01150513 | Completed              | Chemotherapy |
|                            | NCT04335669 | Recruiting             | Chemotherapy |
|                            | NCT01112826 | Completed              | Chemotherapy |
|                            | NCT00532727 | Unknown                | Chemotherapy |
|                            | NCT01881230 | Completed              | Chemotherapy |

|             |                        |              |
|-------------|------------------------|--------------|
| NCT02488967 | Recruiting             | Chemotherapy |
| NCT00789581 | Completed              | Chemotherapy |
| NCT02225470 | Completed              | Chemotherapy |
| NCT01057069 | Active; not recruiting | Chemotherapy |
| NCT01805076 | Active; not recruiting | Chemotherapy |
| NCT00130533 | Completed              | Chemotherapy |
| NCT02445391 | Recruiting             | Chemotherapy |
| NCT00912444 | Terminated             | Chemotherapy |
| NCT00630032 | Completed              | Chemotherapy |
| NCT02207335 | Unknown                | Chemotherapy |
| NCT01662128 | Recruiting             | Chemotherapy |
| NCT00022516 | Completed              | Chemotherapy |

---
